# Supplementary material for: DNA Damage Regulates the Functions of the RNA Binding Protein Sam68 through ATM-Dependent Phosphorylation
Source: MDPI journal article supplement (doi:10.3390/cancers14163847), 2022-08-09
Supplement: s1 [file s1]

**Supplementary Table S1.**

List of the oligonucleotides used in this study.

|               | Forward                   | Reverse                                                    |
|---------------|---------------------------|------------------------------------------------------------|
| PPP3CC        | GGTGTCCACTCCCAGTTCAA      | CAGGTCCAATGGGTGAGCAG (EX14)<br>GGTCCTTCTTGACGCCTGTG (EX16) |
| SETMAR dpA    | AGCATTACATCTGAGAAGT       | TGTGCAACATGCGGTCGGGC                                       |
| SETMAR IPA    | TGAGAAGGAACCCAGCATGT      | TTCCACTATAGGGAGGGGCA                                       |
| PRKACB IPA    | AGTACCAGATTATCTCTCCCATGT  | TGGCAAAAATTCCACTTTCATGACT                                  |
| PRKACB S dpA  | GTGAAAGCACCTTGTAAACTGTAAC | CCTAGCTACAGTAGTGCATAGGAA                                   |
| CD44 minigene | CCTGGTGTGTGGGGAGCGT       | CCACCCAGCTCCAGTTGTGCCA                                     |
