# Supplementary material for: DNA Damage Regulates the Functions of the RNA Binding Protein Sam68 through ATM-Dependent Phosphorylation
Source: MDPI journal article supplement (doi:10.3390/cancers14163847), 2022-08-09
Supplement: s1 [file s1]

### Figure 2B

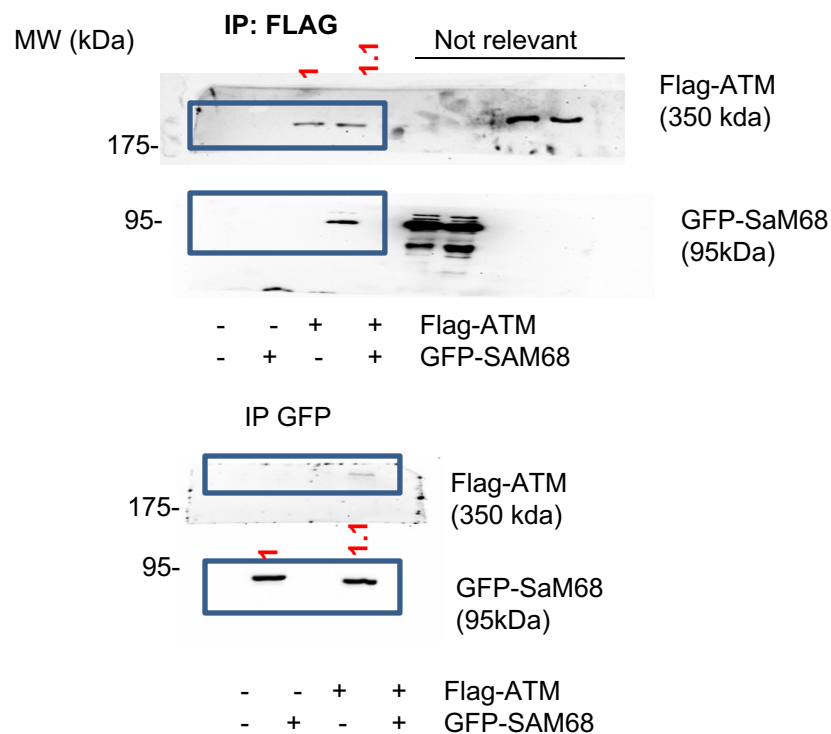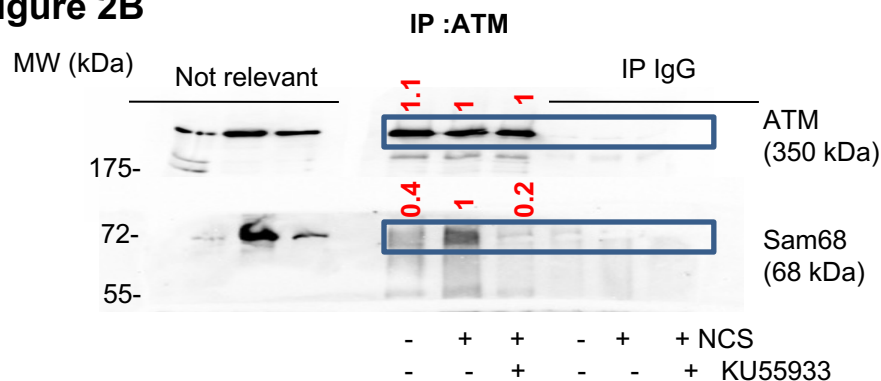

**Figure S1.** Uncropped Western blot of Figure 2 A and 2B and and normalized densitometry in red.

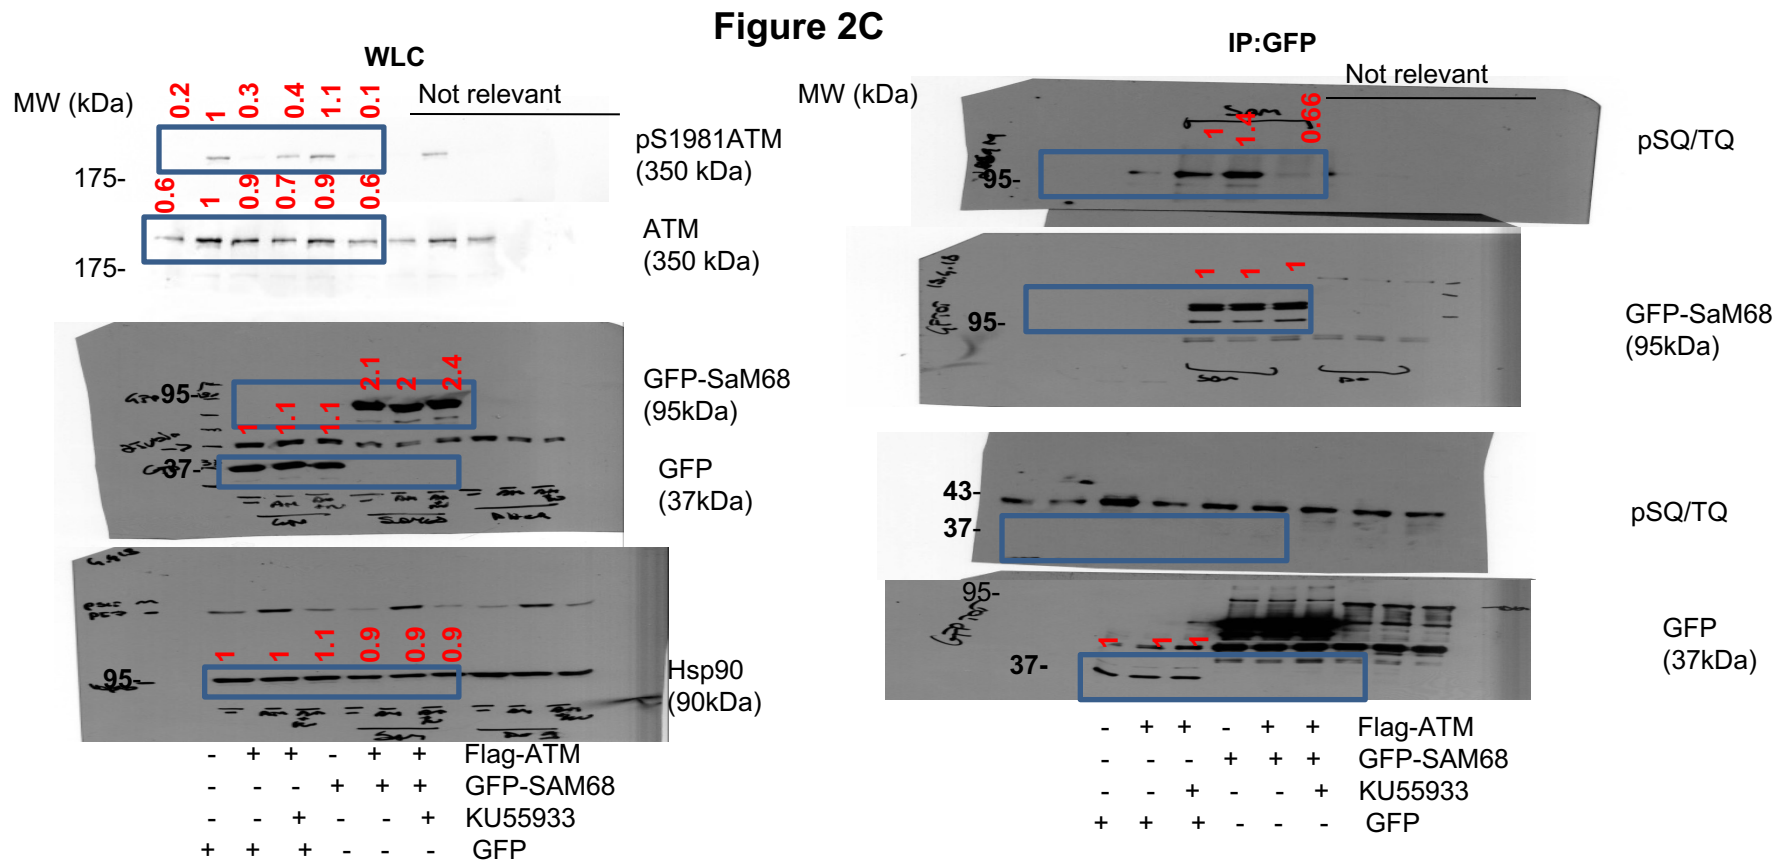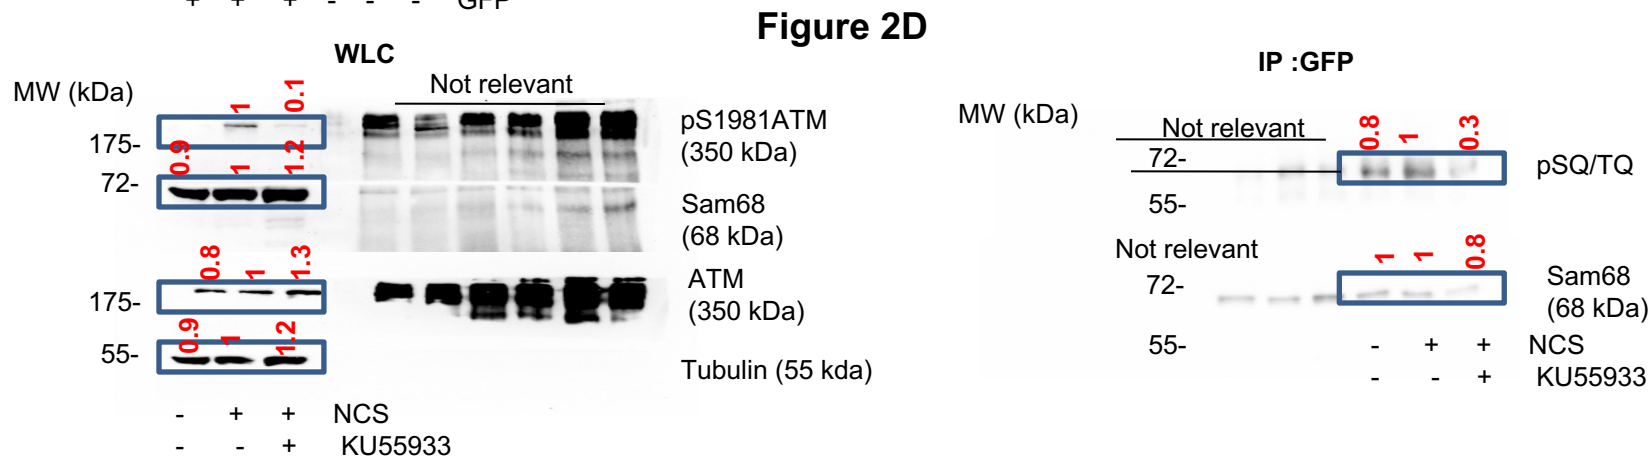

**Figure S1.** Uncropped Western blot of Figure 2 C and 2D and normalized densitometry in red.

**Figure 3B**

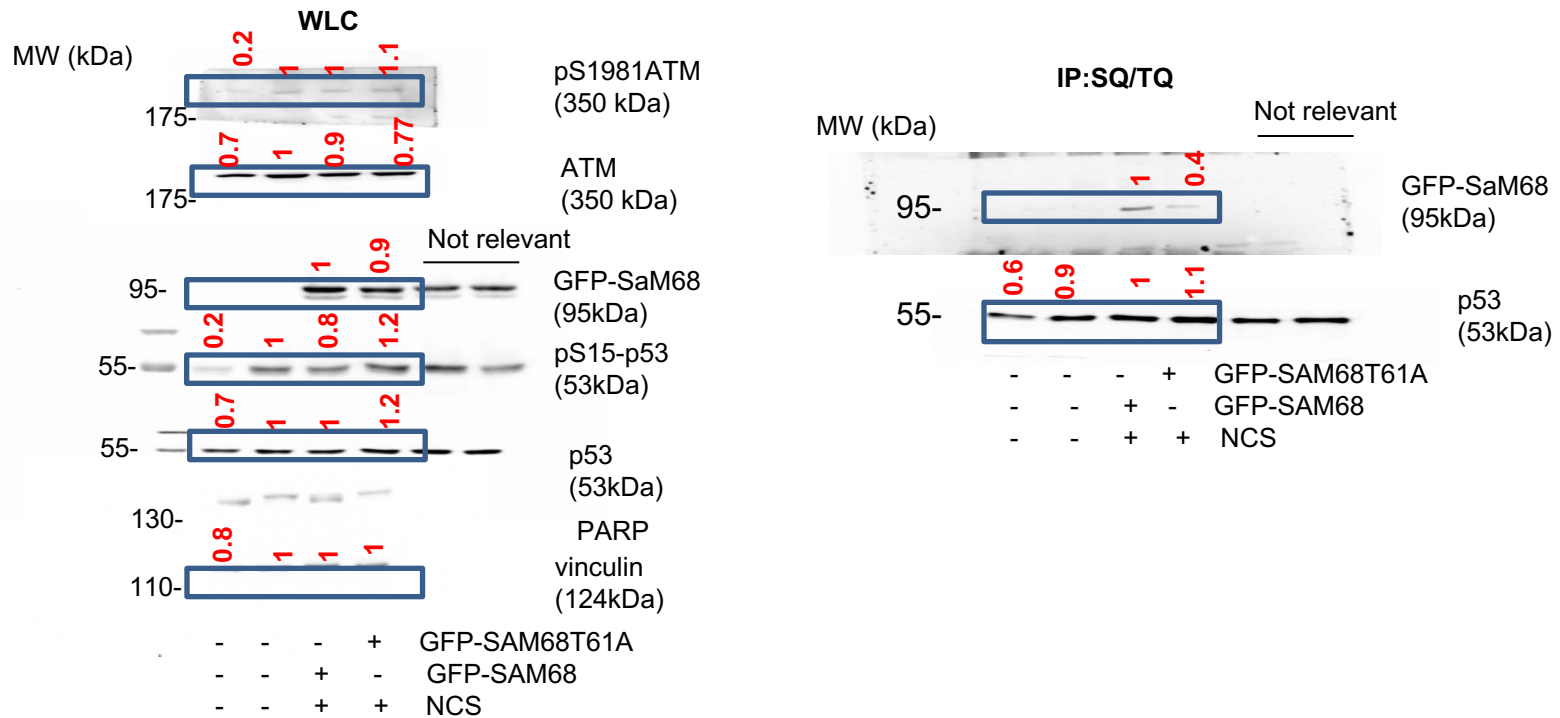

**Figure 3C**

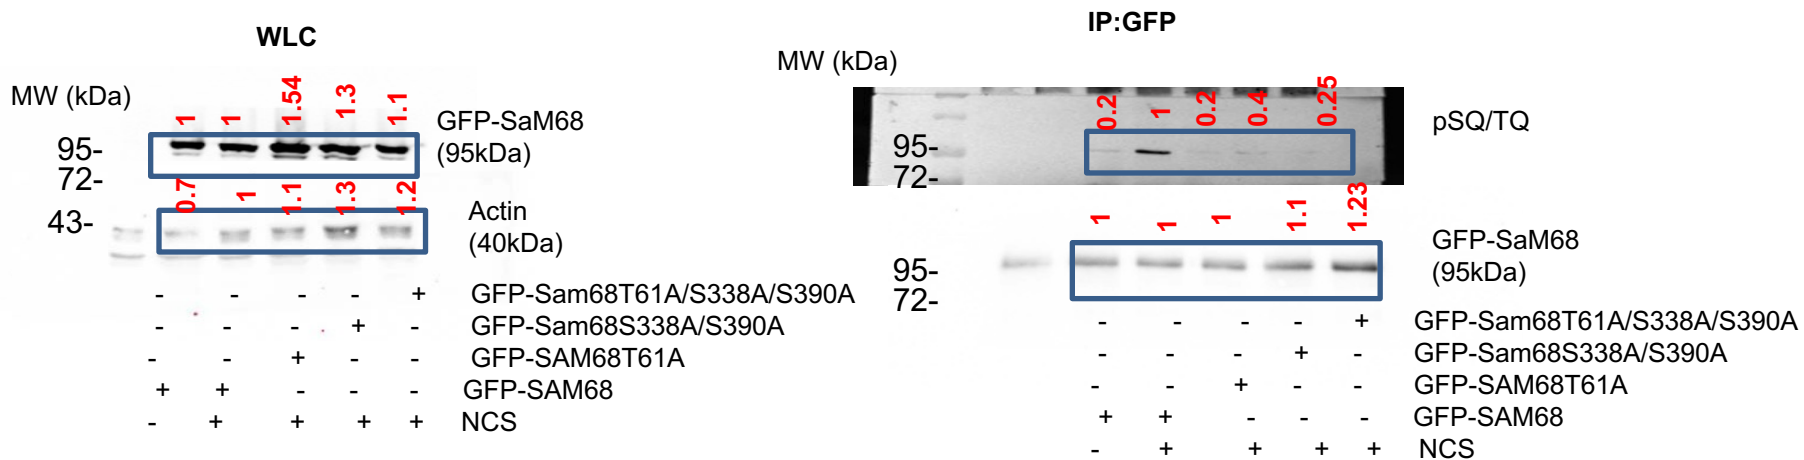

**Figure S1.** Uncropped Western blot of Figure 3 B and 3C and normalized densitometry in red.

**Figure 4A**

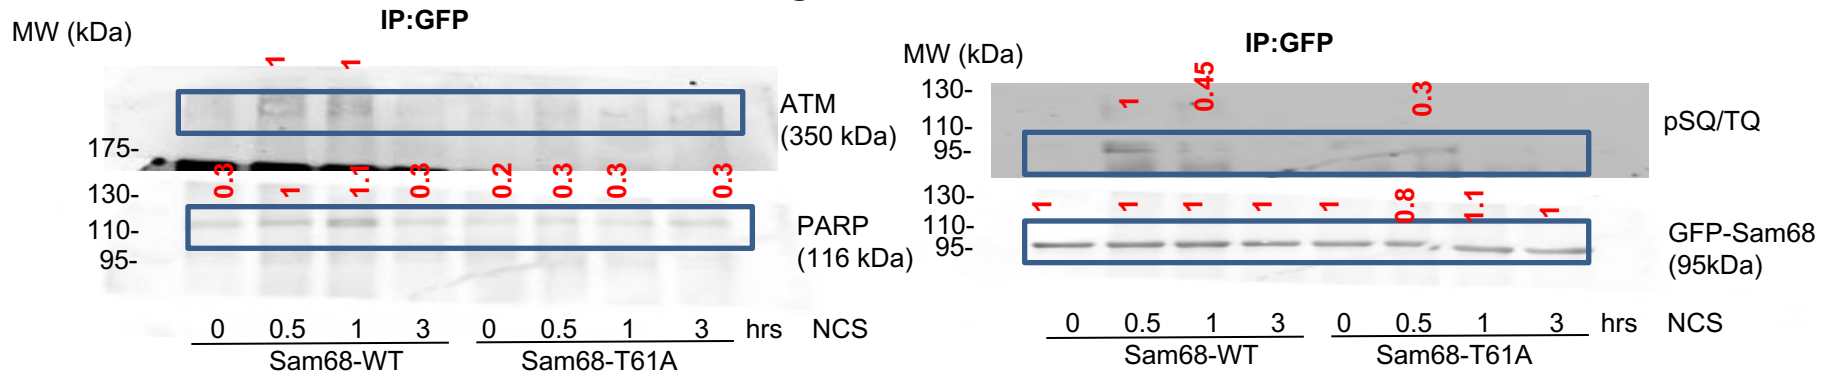

**Figure 4B**

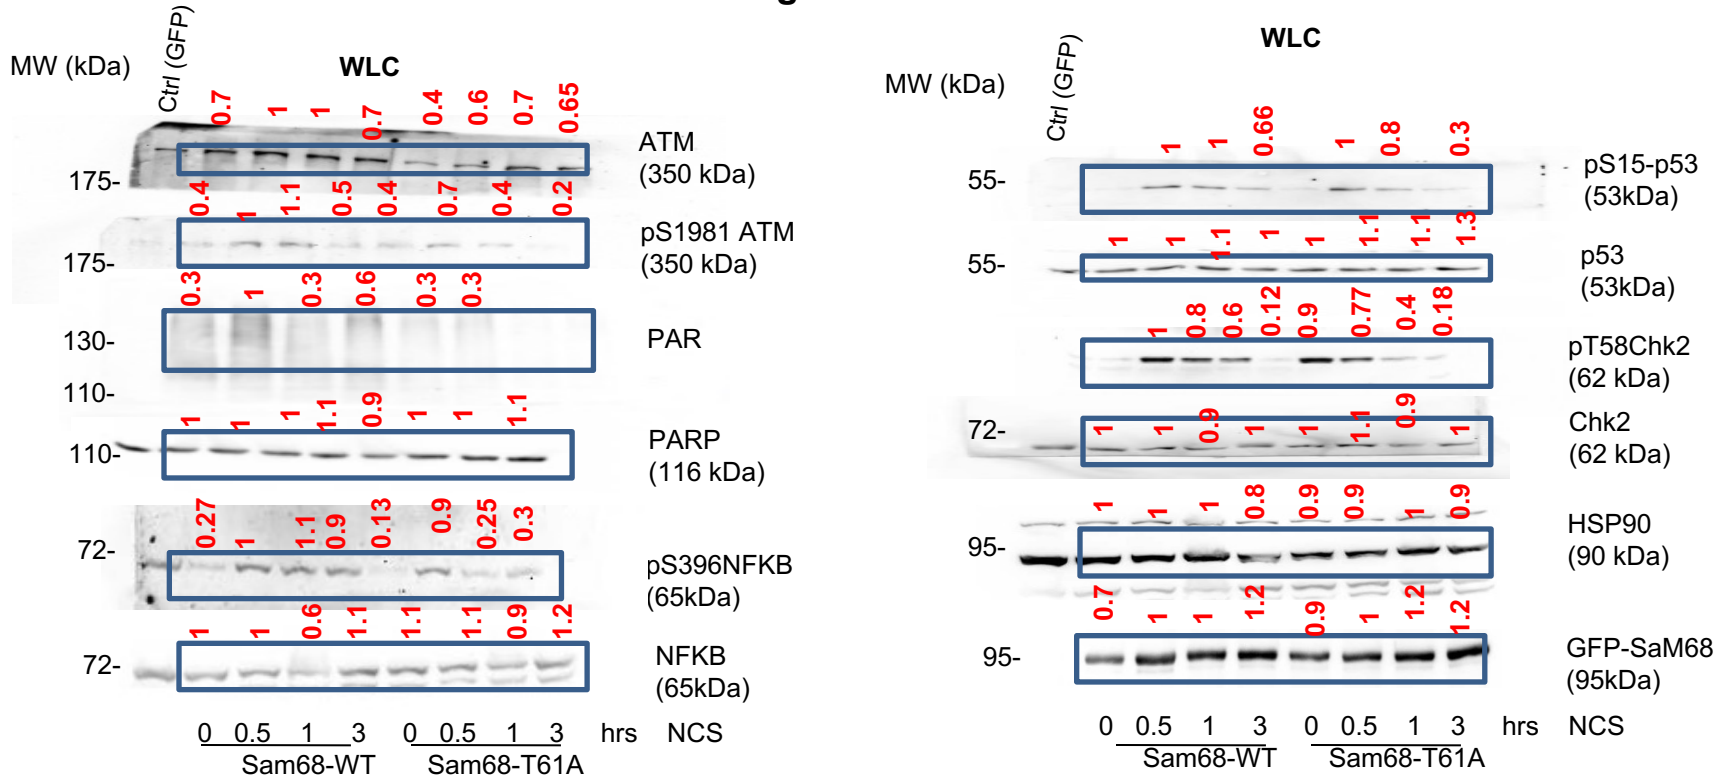

**Figure S1.** Uncropped Western blot of Figure 4A and 4B and normalized densitometry in red.

**Figure 4C**

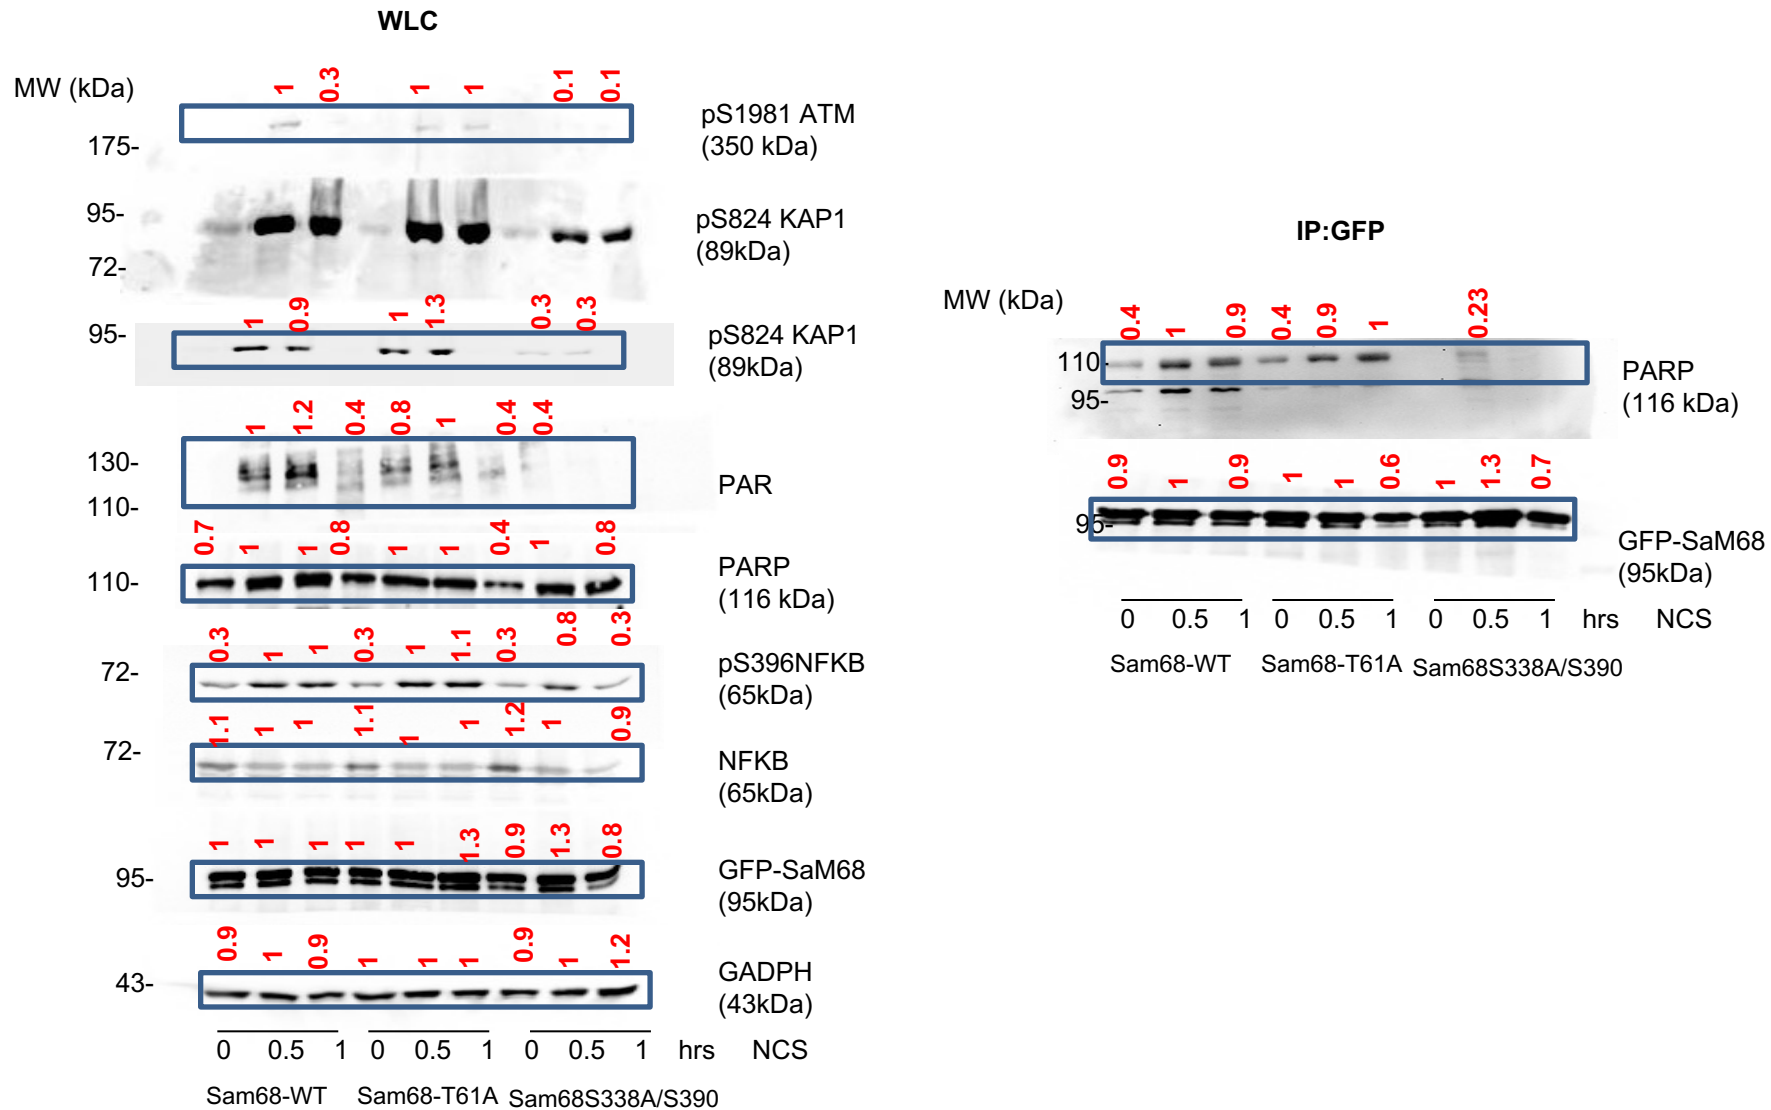

**Figure S1.** Uncropped Western blot of Figure 4C and normalized densitometry in red.

Figure 5A

PolyA pulldown

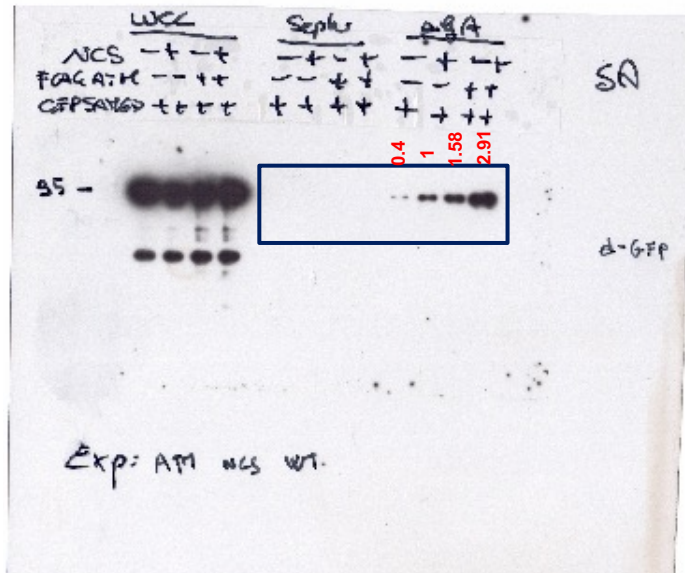

GFP-Sam68 (95 kDa)

WCL

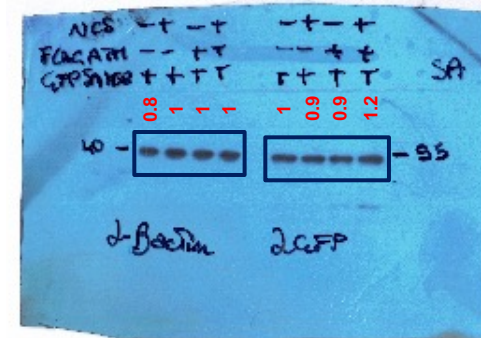

β-Actin (40 kDa)

GFP-Sam68 (95 kDa)

Figure S1. Uncropped Western blot of Figure 5A and normalized densitometry in red.

**WCL   PolyA pulldown**

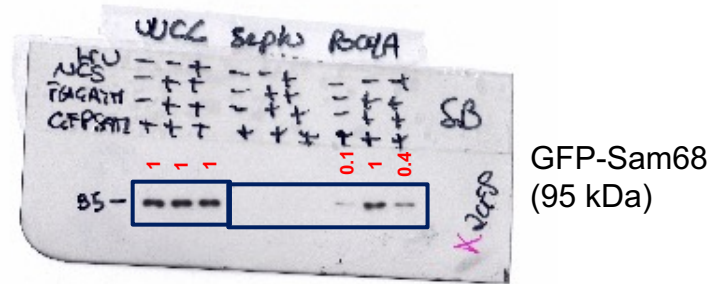

GFP-Sam68  
(95 kDa)

**WCL**

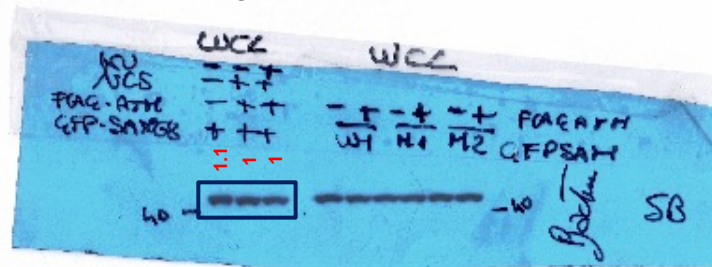

β-Actin  
(40 kDa)

**Figure S1.** Uncropped Western blot of Figure 5B and normalized densitometry in red.

Figure 5C

PolyA pulldown

GFP-Sam68  
(95 kDa)

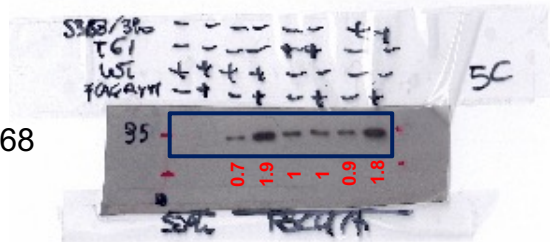

WCL

GFP-Sam68  
(95 kDa)

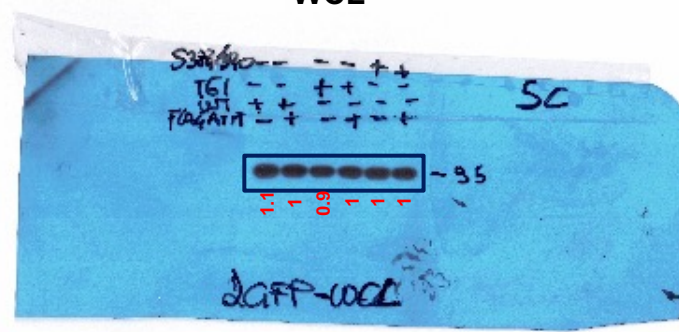

WCL

$\beta$ -Actin  
(40 kDa)

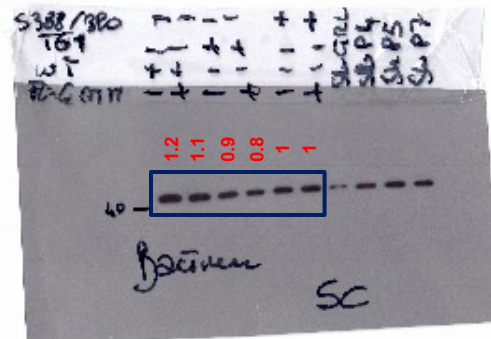

Figure S1. Uncropped Western blot of Figure 5C and normalized densitometry in red.

**Figure 6C**

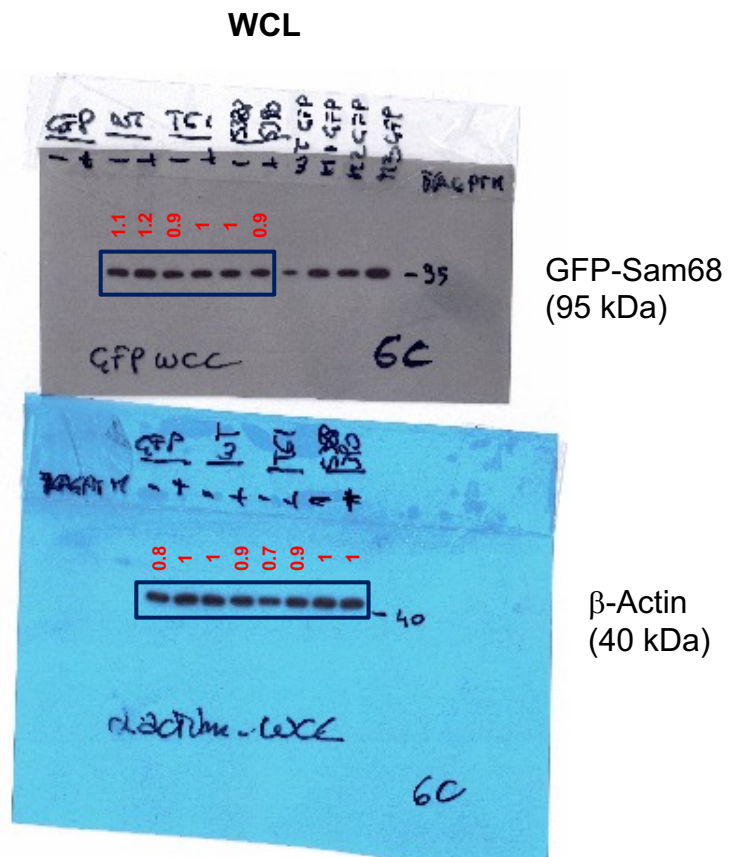

**Figure S1.** Uncropped Western blot of Figure 6C and normalized densitometry in red.

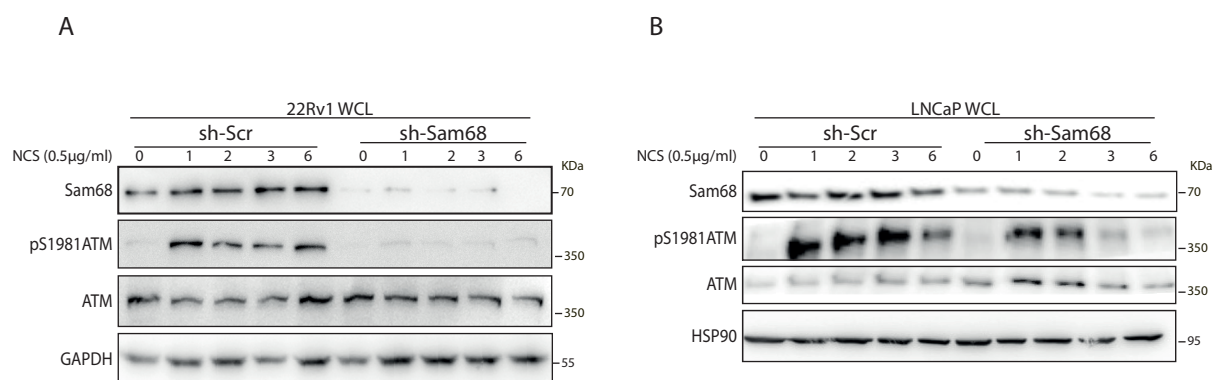

**Figure S2.** Sam68 induces DDR pathway activity. Relative to Figure 1. (A,B) 22Rv1 (**A**) and LNCaP (**B**) cells were silenced (sh-Sam68) or not (sh-Scr) for Sam68 and treated or not with NCS (500 ng/ml) for 1,2,3 or 6 hours. Proteins were extracted and analyzed by Western Blot analysis. (**A**) Representative Western blot of total protein extracts (WCL) were immunoblotted for the indicated antibodies. GAPDH and HSP90 were evaluated as loading controls of total protein extracts.

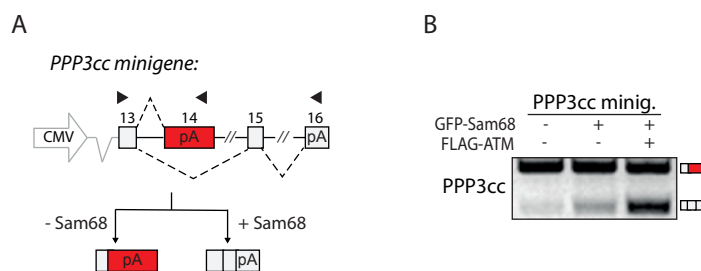

**Figure S3.** ATM modulates APA activity of Sam68. Relative to Figure 5. **(A)** Schematic representation of PPP3CC minigene. The exon 14 in red is the premature last exon, while the exon 16 contains the canonic dpA; Black arrows indicate primers used for the PCR analysis. **(B)** Representative PCR agarose gel of pA selection in PPP3CC minigene system transfected in HEK293T cells in presence, or not, of GFP-Sam68 and FLAG-ATM plasmids.
